# Supplementary material for: Multi-state memristive behavior in a light-emitting electrochemical cell
Source: Royal Society of Chemistry journal article supplement (doi:10.1039/c7tc03920d), 2017-01-01
Supplement: c7tc03920d1.pdf [file c7tc03920d1.pdf]

## Supporting information

# Multi-state Memristive Behavior in the Light-Emitting Electrochemical Cell

*Chien-Chung Shih, Chao-Wei Huang, Meng-yao Gao, Chu-Chen Chueh, and Wen-Chang Chen\**

Department of Chemical Engineering, National Taiwan University, Taipei, 10617  
Taiwan, E-mail: [chenwc@ntu.edu.tw](mailto:chenwc@ntu.edu.tw)

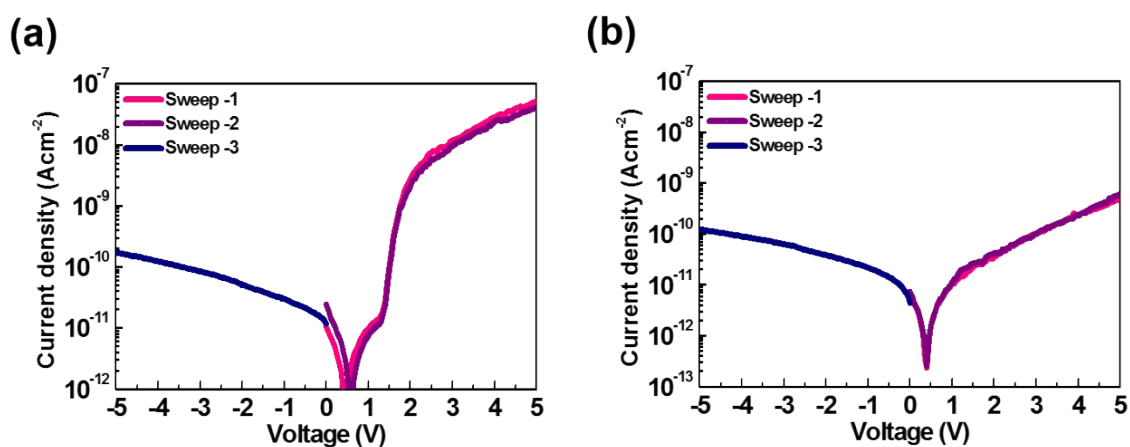

**Figure S1.** Current–voltage characteristics of the memory devices fabricated with (a)  $(\text{MEH-PPV})_{20}(\text{MHPI})_{4-3}$  and (b)  $(\text{MEH-PPV})_{20}(\text{MHPI})_{6-5}$  as the memory layer.

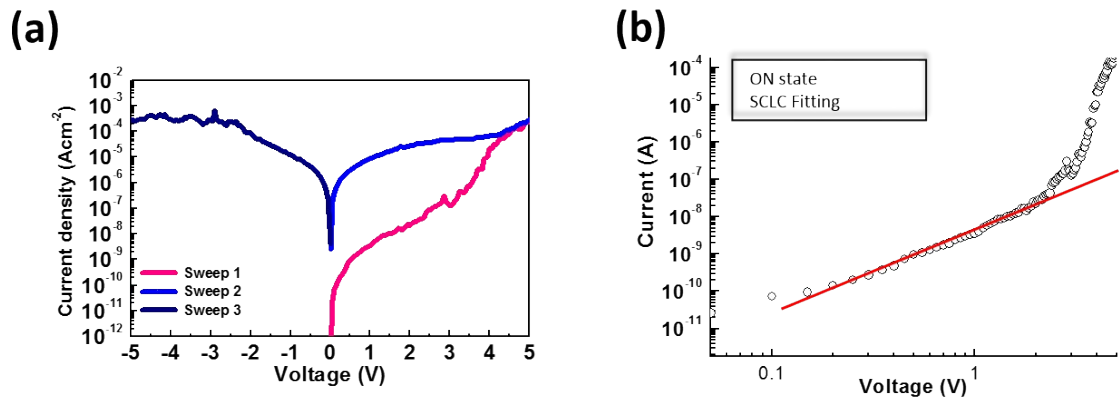

**Figure S2.** (a) Current–voltage characteristics of the memory device fabricated with a MH7-b-PI<sub>3.8k</sub> thin layer. (b) space-charge-limited current (SCLC) model fitting for the device.

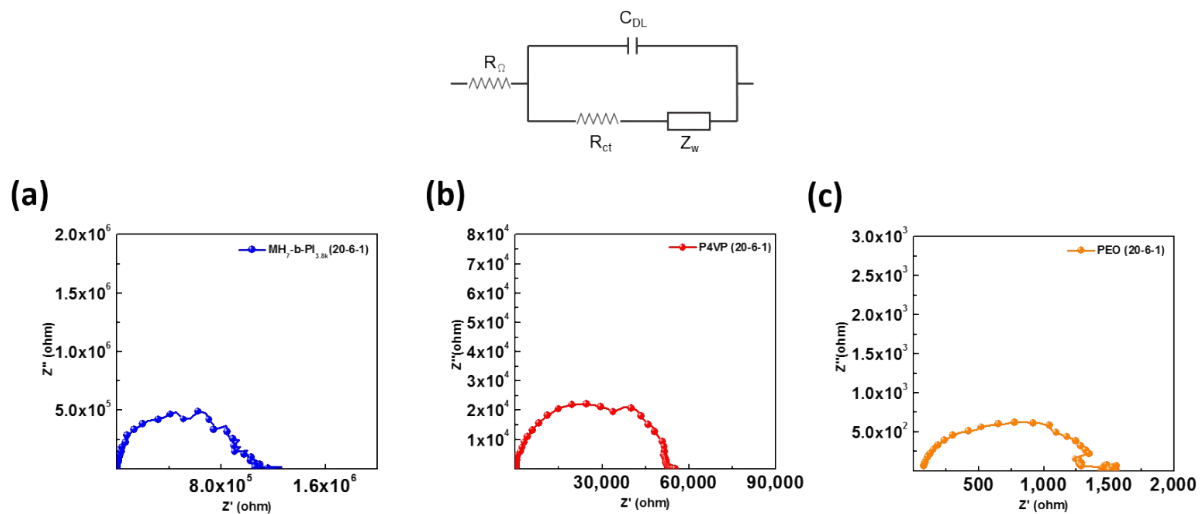

**Figure S3.** Impedance measurement for (a) (MEH-PPV)<sub>20</sub>(MHPI)<sub>6</sub>-1, (b) (MEH-PPV)<sub>20</sub>(P4VP)<sub>6</sub>-1, and (c) (MEH-PPV)<sub>20</sub>(PEO)<sub>6</sub>-1 in the frequency range of 20 Hz to 1 MHz, respectively. In Randles equivalent circuit,  $R_{\Omega}$  represents the solution resistance,  $C_{DL}$  is the capacitance for the double layer charging process,  $R_{ct}$  is the contact resistance contributing to the charge transfer resistance through the electrode-polymer interfaces, and  $Z_w$  is the Warburg impedance arising from the mass transfer process

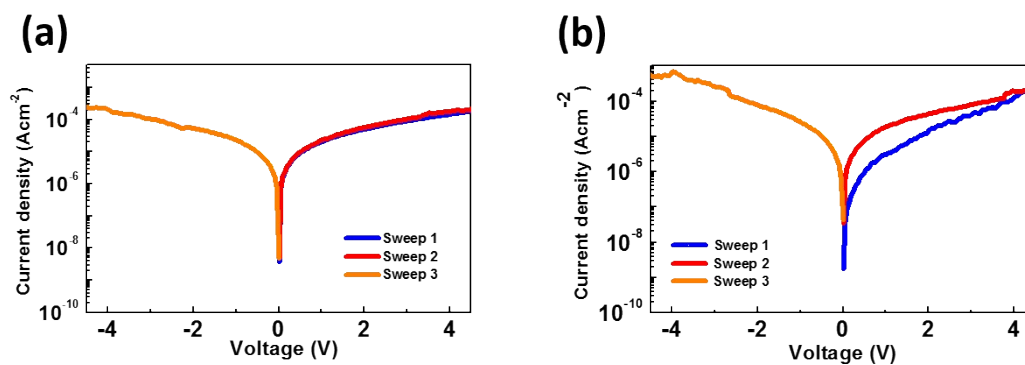

**Figure S4.** (a) Current–voltage characteristics of the memory devices fabricated with  $(\text{MEH-PPV})_{20}(\text{PEO})_{6-1}$ , and  $(\text{MEH-PPV})_{20}(\text{P4VP})_{6-1}$  as the memory layer.

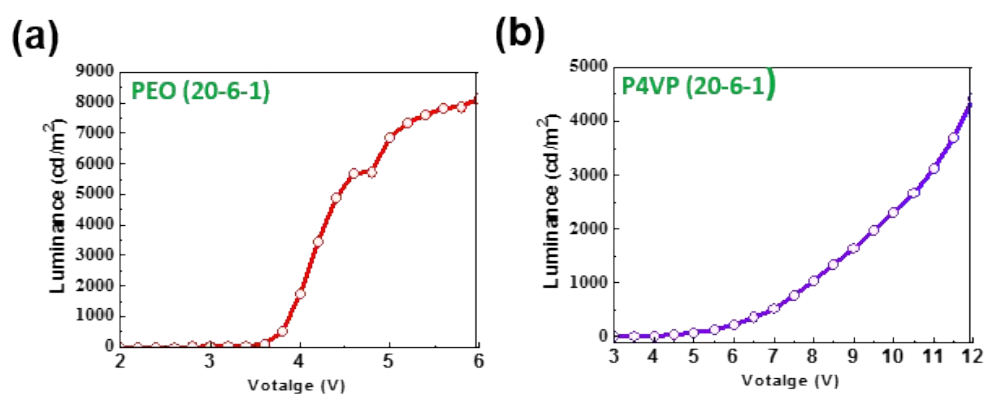

**Figure S5.** Optoelectronic properties for (ITO/memory layer /Al). The memory layer is a composite consisting of (a)  $(\text{MEH-PPV})_{20}(\text{PEO})_{6-1}$  (b)  $(\text{MEH-PPV})_{20}(\text{P4VP})_{6-1}$

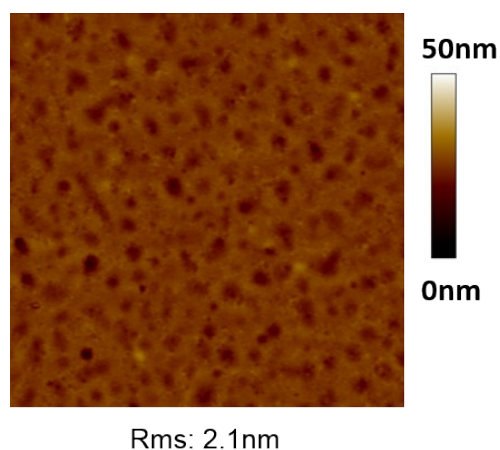

**Figure S6.** AFM image of the memory layer (MEH-PPV)<sub>20</sub>(MHPI)<sub>6</sub>-1 stored in the ambient condition after three months.

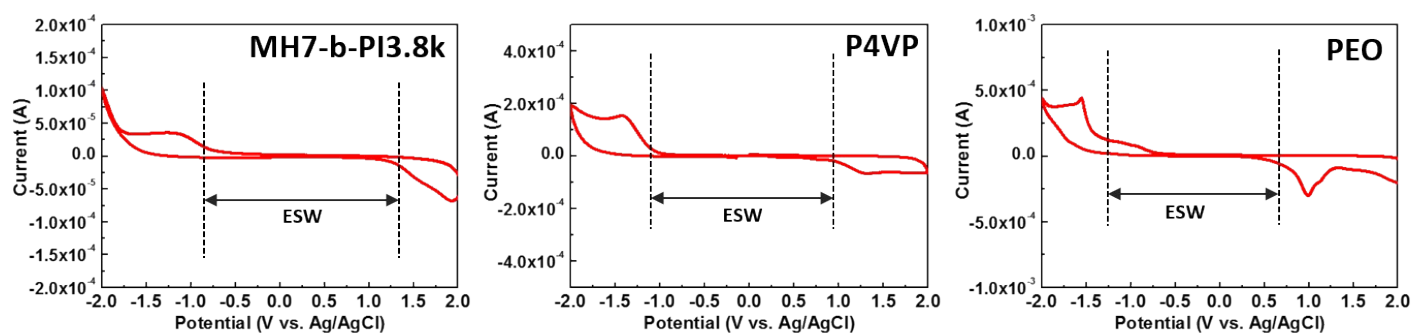

**Figure S7.** Cyclic voltammetry traces of MH7-b-PI<sub>3.8k</sub>, P4VP and PEO.

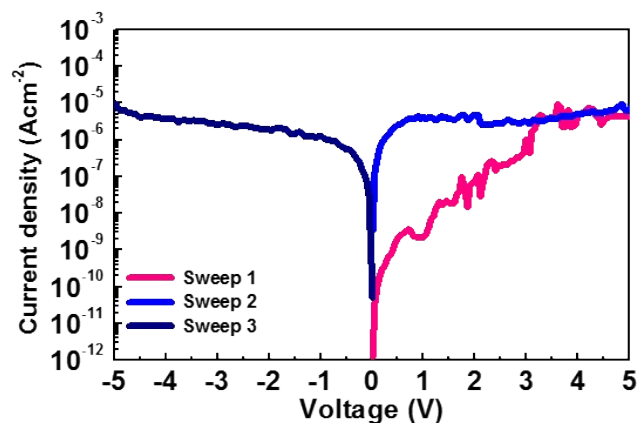

**Figure S8.** Current–voltage characteristics of a memory device fabricated with (MEH-PPV)<sub>20</sub>(MHPI)<sub>6-0</sub> as the memory layer.

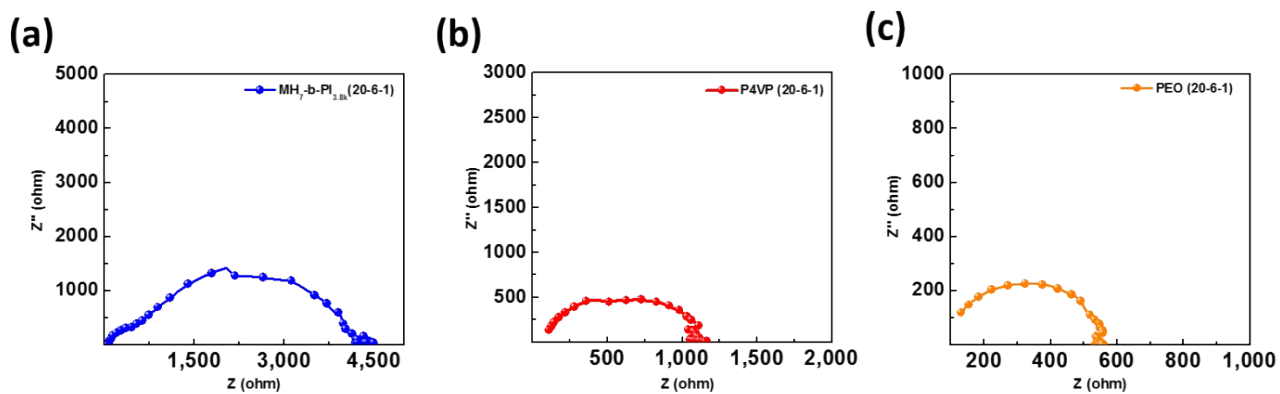

**Figure S9.** Impedance measurement for (a) (MEH-PPV)<sub>20</sub>(MHPI)<sub>6-1</sub>, (b) (MEH-PPV)<sub>20</sub>(P4VP)<sub>6-1</sub>, and (c) (MEH-PPV)<sub>20</sub>(PEO)<sub>6-1</sub> after writing (5V charging, 3s), in the frequency range of 20 Hz to 1 MHz, respectively.

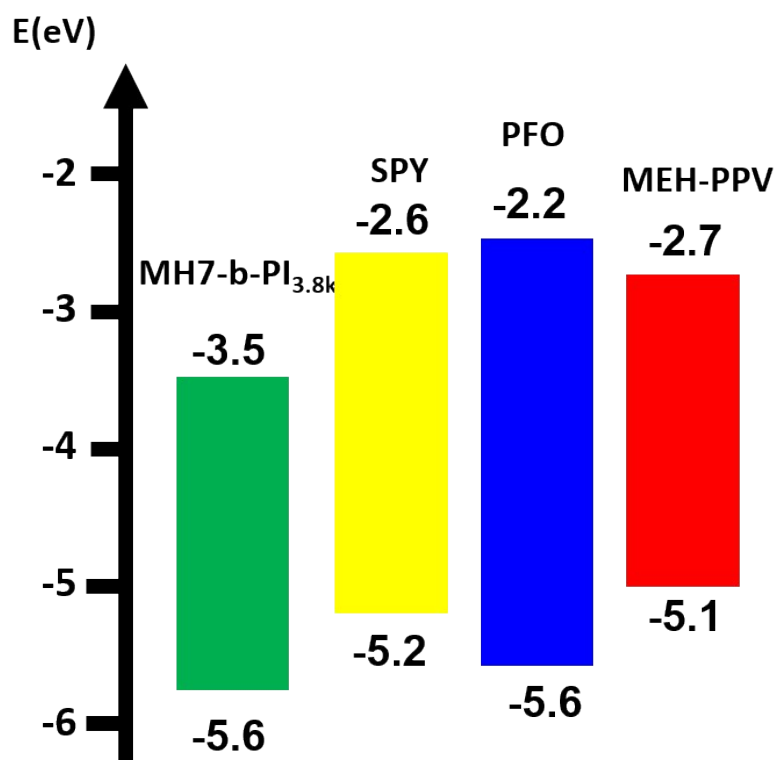

**Figure S10.** The energy levels for MH7-b-PI<sub>3.8k</sub> and light-emitters used in this study.
